# Supplementary material for: Cohort profile: The Golden Retriever Lifetime Study (GRLS)
Source: PubMed Central journal article supplement (PMC9182714; doi:10.1371/journal.pone.0269425), 2022-06-09

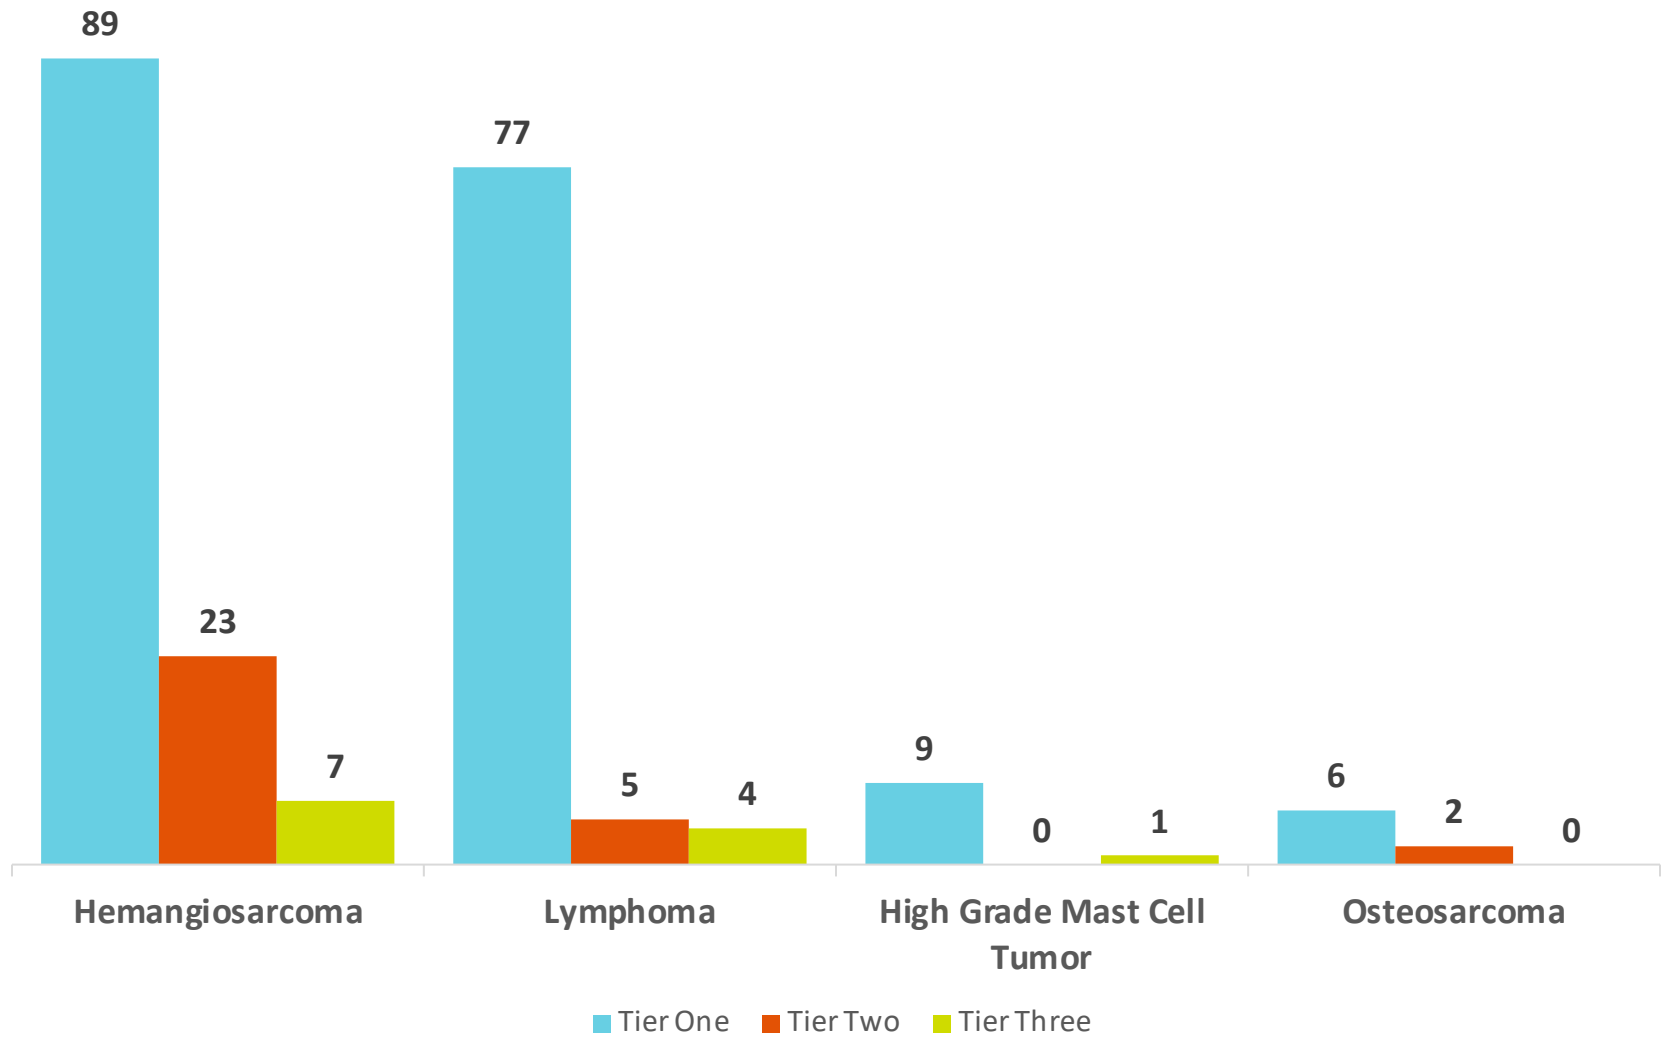

Supplement: pone.0269425.s002.pdf [file pone.0269425.s002.pdf]
