# Supplementary material for: Cohort profile: The Golden Retriever Lifetime Study (GRLS)
Source: PubMed Central journal article supplement (PMC9182714; doi:10.1371/journal.pone.0269425), 2022-06-09
Supplement: pone.0269425.s003.pdf [file pone.0269425.s003.pdf]

|                             | Initial Diagnostic Laboratory | Current Diagnostic Laboratory |
|-----------------------------|-------------------------------|-------------------------------|
| <b>CHEMISTRY</b>            |                               |                               |
| Instrument used             | Beckman Coulter AU-series     | Beckman Coulter AU-series     |
| Glucose                     | ✓                             | ✓                             |
| Creatinine                  | ✓                             | ✓                             |
| BUN                         | ✓                             | ✓                             |
| BUN: Creatinine Ratio       | ✓                             | ✓                             |
| Phosphorus                  | ✓                             | ✓                             |
| Calcium                     | ✓                             | ✓                             |
| Corrected Calcium           | ✓                             | -                             |
| Magnesium                   | ✓                             | ✓                             |
| Sodium                      | ✓                             | ✓                             |
| Potassium                   | ✓                             | ✓                             |
| Sodium: Potassium Ratio     | ✓                             | ✓                             |
| Chloride                    | ✓                             | ✓                             |
| CO2                         | -                             | ✓                             |
| Anion Gap                   | -                             | ✓                             |
| Osmolality (Calc)           | -                             | ✓                             |
| Total Protein               | ✓                             | ✓                             |
| Albumin                     | ✓                             | ✓                             |
| Globulin                    | ✓                             | ✓                             |
| Albumin: Globulin Ratio     | ✓                             | ✓                             |
| ALT                         | ✓                             | ✓                             |
| AST                         | ✓                             | ✓                             |
| Alk Phosphatase             | ✓                             | ✓                             |
| GGT                         | ✓                             | ✓                             |
| Total Bilirubin             | ✓                             | ✓                             |
| Cholesterol                 | ✓                             | ✓                             |
| Creatinine Kinase (CK)      | ✓                             | ✓                             |
| Triglyceride                | ✓                             | -                             |
| Amylase                     | ✓                             | -                             |
| <b>COMPLETE BLOOD COUNT</b> |                               |                               |
| Instrument used             | Siemens Advia                 | Siemens Advia                 |
| WBC                         | ✓                             | ✓                             |
| RBC                         | ✓                             | ✓                             |
| Hemoglobin (HGB)            | ✓                             | ✓                             |
| Hematocrit (HCT)            | ✓                             | ✓                             |
| MCV                         | ✓                             | ✓                             |
| MCHC                        | ✓                             | ✓                             |
| CHCM                        | -                             | ✓                             |
| RDW                         | -                             | ✓                             |
| Neutrophil - Count and %    | ✓                             | ✓                             |
| Lymphocyte - Count and %    | ✓                             | ✓                             |
| Monocyte - Count and %      | ✓                             | ✓                             |
| Eosinophil - Count and %    | ✓                             | ✓                             |
| Basophil - Count and %      | ✓                             | -                             |
| Platelet Count              | ✓                             | ✓                             |
| Platelet Estimate           | ✓                             | -                             |

|                         |                           |                             |
|-------------------------|---------------------------|-----------------------------|
| MPV                     | -                         | ✓                           |
| <b>URINALYSIS</b>       |                           |                             |
| Instrument used         | Siemens Atlas             | Siemens Novus               |
| Color                   | ✓                         | ✓                           |
| Clarity/appearance      | ✓                         | ✓                           |
| Specific Gravity        | ✓                         | ✓                           |
| Glucose                 | ✓                         | ✓                           |
| Bilirubin               | ✓                         | ✓                           |
| Ketones                 | ✓                         | ✓                           |
| Occult blood            | ✓                         | ✓                           |
| pH                      | ✓                         | ✓                           |
| Protein                 | ✓                         | ✓                           |
| WBCs                    | ✓                         | ✓                           |
| RBCs                    | ✓                         | ✓                           |
| Epithelial Cells        | ✓                         | ✓                           |
| Bacteria                | ✓                         | ✓                           |
| Crystals                | ✓                         | ✓                           |
| Casts                   | ✓                         | ✓                           |
| <b>PARASITOLOGY</b>     |                           |                             |
| Ova & Parasite          | Zinc sulfate float        | Sugar float                 |
| Heartworm antigen       | Accuplex Immunoassay      | Dirocheck ELISA             |
| <b>ADDITIONAL TESTS</b> |                           |                             |
| Total T4                | Beckman Coulter AU-series | Siemens Immunolite 2000 XPI |
| Pancreatitis assay      | PrecisionPSL              | DGGR Lipase                 |
