# Supplementary material for: Cohort profile: The Golden Retriever Lifetime Study (GRLS)
Source: PubMed Central journal article supplement (PMC9182714; doi:10.1371/journal.pone.0269425), 2022-06-09
Supplement: pone.0269425.s004.pdf [file pone.0269425.s004.pdf]

| Confidence  | Tier | Category                                                                                      |
|-------------|------|-----------------------------------------------------------------------------------------------|
| Definitive  | 1    | Microscopically confirmed (histology or cytology*)                                            |
| Presumptive | 2    | Not microscopically confirmed, but strongly suspected due to direct visualization or imaging^ |
|             | 3    | Clinical suspicion only                                                                       |

\*Cytology must be reviewed by a DACVP, otherwise tier 2

^imaging must be reviewed by a DACVR, otherwise tier 3
